# Supplementary material
Source: Springer Nature journal article supplement (https://www.springermedizin.de/resource/supplementary/12936_2011_1838_MOESM4_ESM.pdf/9541896)

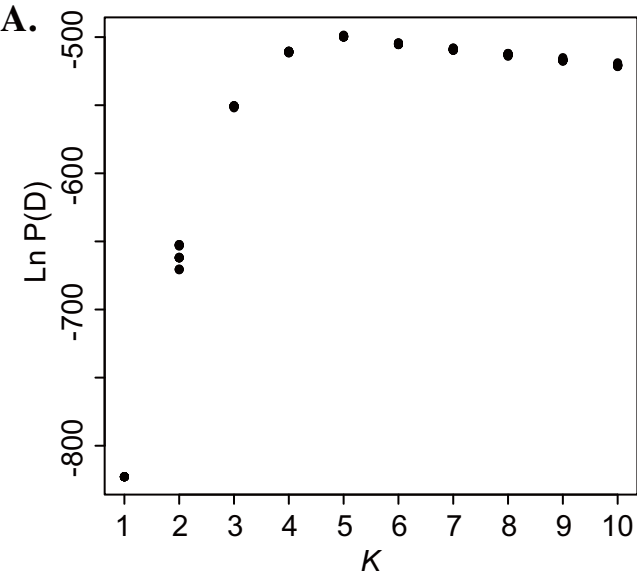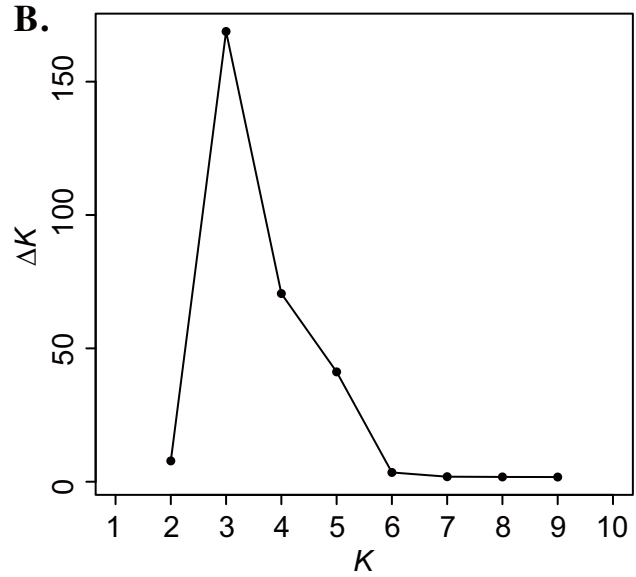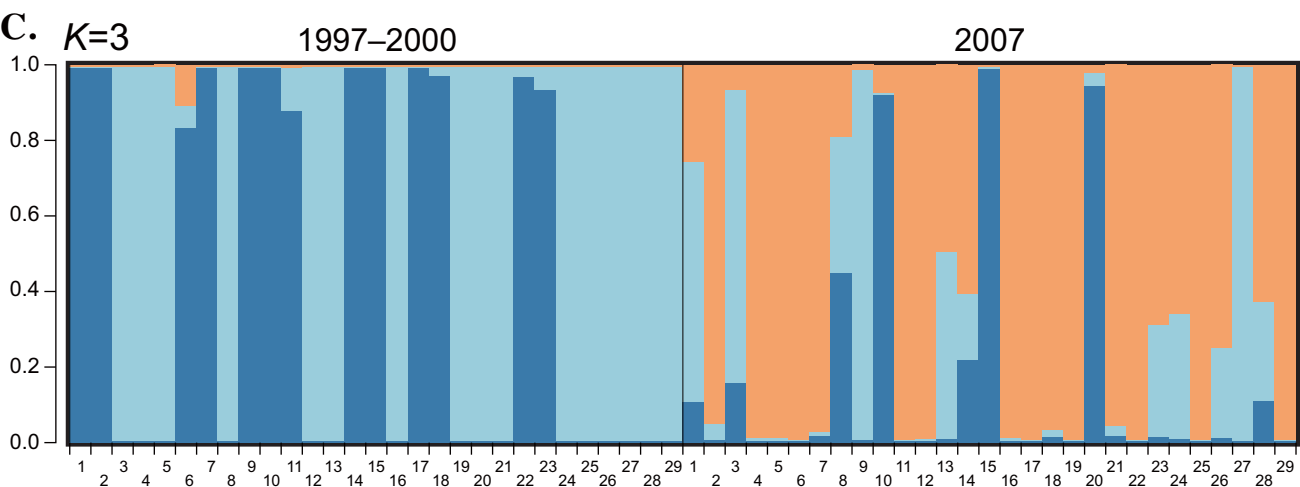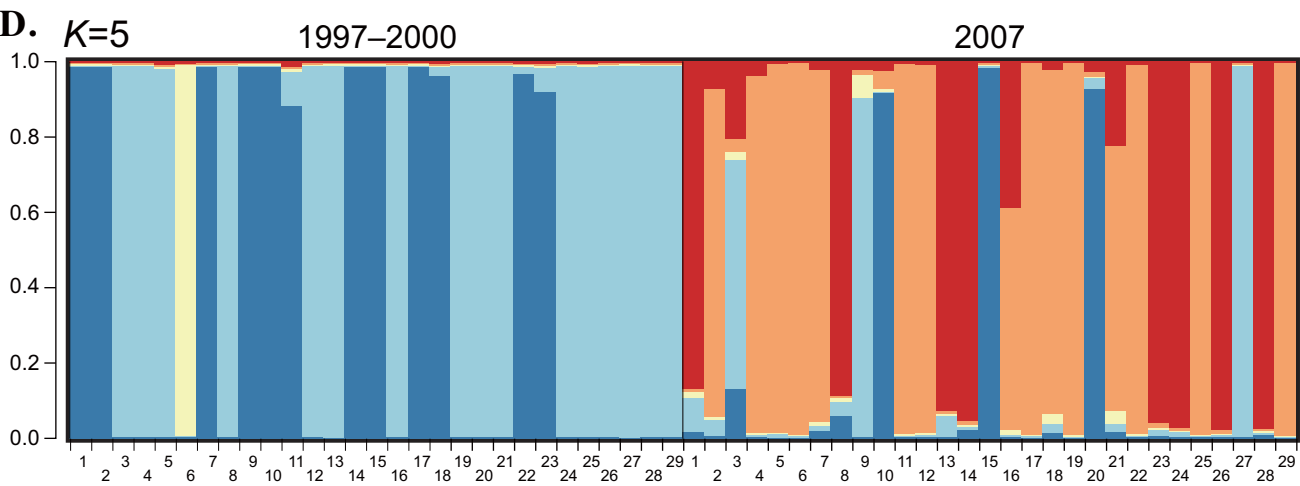

Supplement: MOESM4 [file 9541896]
